# Supplementary material
Source: PubMed Central journal article supplement (PMC5849067)
Supplement: NIHMS946966-supplement-supplement_1.pdf [file NIHMS946966-supplement-supplement_1.pdf]

**TECHNICAL APPENDIX FOR:  
Cost-Effectiveness of Bariatric Surgical Procedures for the Treatment of Severe Obesity**

**AUTHORS: The BOOM Collaborative**

Writing group for the Bariatric Obesity Outcome Modeling Collaborative includes:

Bruce Wang PhD<sup>1</sup>, Edwin S. Wong, PhD<sup>1,2</sup>, Rafael Alfonso-Cristancho MD MSc<sup>1,3</sup>, Hao He PhD<sup>3</sup>, David R. Flum MD MPH<sup>3</sup>, David E. Arterburn MD MPH<sup>4</sup>, Louis P. Garrison PhD<sup>1</sup>, Sean D. Sullivan, PhD<sup>1</sup>

1. Pharmaceutical Outcomes Research and Policy Program, University of Washington, Seattle, WA; 2. Northwest Center for Outcomes Research in Older Adults, VA Puget Sound, Seattle, WA; 3. Surgical Outcomes Research Center, University of Washington, Seattle, WA; 4. Group Health Research Institute, Seattle, WA

**For Correspondence:**

Sean D. Sullivan, PhD

Pharmaceutical Outcomes Research and Policy Program

1959 NE Pacific Ave, H375Q

University of Washington

Seattle, WA 98195

(e) sdsull@uw.edu

(t) +1 206.685.8153

(f) +1 206.543.3835

## **Overview**

The cost-effectiveness model was divided into 2 parts: 1) a decision analytic model, including the surgical procedure and the first five years post-surgery; and 2) an empirical “natural history” model for the non-surgical control population and surgical population beyond the fifth year following surgery. This supplement describes in more detail the inputs and methods used to complete each section. The simulation model was implemented in Microsoft Excel 2010 (Microsoft Corporation, Redmond, WA) with substantial parts of the analysis done in SAS 9.2 (SAS Institute, Cary, NC) and STATA 11.0 (StataCorp, College Station, TX).

## **Decision Tree**

Each of the three surgical procedures considered in this study was simulated to estimate clinical outcomes, costs, and utilities from the initial procedure date to five years post-procedure. We divided the first set of outcomes to identify death within 30 days of the procedure, early, and late complications of each surgical procedure. The first set of branches aimed to identify mortality within the first 30 days and has two states: 1) Death within the first 30 days after the procedure or 2) Alive up to 30 days after the procedure. Those subjects alive at 30 days after the procedure were further divided based on the presence of early complications. Early complications were defined as the presence of readmission within 30 days of surgery or an initial prolonged length of stay (PLOS). PLOS was defined as 1 standard deviation above the mean length of stay during the procedure, which was 12, 5, and 3 days for ORYGB, LRYGB, and LAGB, respectively, in the Medicare database.

There were four initial decision branches: 1) No Surgical Intervention, 2) ORYGB, 3) LRYGB, and 4) LAGB. Each of these branches—except for “No Surgical Intervention”, which utilized the natural history model—has subsequent clinical pathways during the first five years, representing the probability of the most relevant events (i.e. death) associated with the surgical procedures at every year.

## **Inputs**

### *Clinical Events and Mortality*

We used the following CPT-4 codes to identify the procedures: 43846, 43847, 43621, 43631, 43633, 4431, 4439 for ORYGB; 43644, 43645, 43844, 43659, S2085, 4438 for LRYGB; and 43770, S2082, 4495 for LAGB.

The data for complications and mortality were derived directly from the Medicare database, where patients undergoing each specific procedure were identified. We validated our preliminary analyses to support the assumption that patients with readmissions or PLOS during the first 30 days after the procedure had a higher probability of complications, health resource use, costs, and mortality, with the data published by Encinosa and colleagues [1,2].

Mortality in the 0-30 day and 31-365 day periods post procedure were measured as unadjusted rates from the Medicare database. In years 2-5, annual mortality rates were computed as a function of age, sex and BMI (see Lifetime Natural History Model below for more details). BMI changes post procedure were derived from Picot et al. (2009) [3].

### *Direct Medical Costs*

We estimated annual direct medical costs after a bariatric procedure using a generalized linear model (GLM) with a gamma distribution and log link function. The link function was validated using a Box-Cox regression and the outcome distribution was validated using the Modified Park Test [4]. Our method addressed the fact that costs had a lower bound of zero in some periods and a positively skewed distribution. The GLM method has been widely used and recommended in the analysis of costs exhibiting these characteristics. The decision analytic model requires the quantification of costs for those subjects who survive during the entire period, as well as the costs for those subjects who die during the first five years after surgery. We use both Medicare and MarketScan® data for the former and Medicare data for the latter. All cost data were adjusted to 2010 dollars using the Consumer Price Index (CPI) obtained from the Bureau of Labor Statistics.

In the GLM, we included procedure type (ORYGB, LRYGB, and LAGB), complications (death within 30 days, alive with complications, alive without complications), age, and gender as adjustment variables. We performed this analysis separately for each of the periods of the decision tree model—0-30 days, 31 days – 1 year, Year 2, Year 3, Year 4, and Year 5 (Tables 5-10).

### *Utilities*

Utilities and changes in BMI associated with each procedure were drawn from published sources— specifically from the report published by Picot and colleagues [3] and individual clinical trials assessing the quality of life and changes in utility following the first 30 days after procedures. Utilities for subsequent periods were modeled using the Medical Expenditure Panel Survey (MEPS) data from years 2000-2006. We converted the physical and mental summary components of the SF-12 to EQ-5D scores using the algorithm described in Franks, et al. (2003) [5]. We then estimated adjusted utility values using GLM, assuming a log link and gamma distribution. Because EQ-5D scores were between 0 and 1 and the distribution of EQ-5D scores was left-skewed, we used a reflective transformation to allow for estimation using GLM. We verified the validity of the link function using the Box-Cox test and of the outcome distribution using the Modified Park test. We did not employ a two-part model because EQ-5D scores were derived from the estimated model in Franks, et al. (2003) and the resulting distribution of EQ-5D scores did not exhibit a spike at one. Our GLM model adjusted for BMI, age and gender. A squared term for BMI was not statistically significant. Given the coefficients from the GLM, we computed predicted utility scores conditional on specified covariate values. Predicted utilities were generated for each procedure in years one through five, post-surgery. BMI values post-surgery were derived from a systematic review by Picot and colleagues [3]. We also used this systematic review to provide an adjustment for utilities in the first 30 days post-surgery for those who experienced post-surgical complications (Tables 1, 2, and 3).

## **Lifetime Natural History Model**

Patients who did not have a bariatric procedure followed a natural history pathway; hence, by definition, they enter the lifetime natural history model immediately (i.e., five years earlier than a similar surgical procedure patient). All other patients are transitioned from the decision-tree model after five years. The natural history model was driven by the estimated trajectory of BMI values over time. Given the BMI values, we then predicted outcomes at each period to complete the cost-effectiveness analysis.

### **Inputs**

#### *BMI Trajectory Model*

Longitudinal data from Group Health (GH) [6] tracked BMI values for over 60,000 individuals who have reached a BMI of 35 kg/m<sup>2</sup> or greater during the period 2005-2010. To estimate BMI as a function of time (days), we used Generalized Estimating Equations (GEE) with an identity link and normal distribution. In our model, we included linear and quadratic terms for time, while adjusting for baseline BMI, age and sex. The specific model we estimated was:

$$BMI_{i,t} = b_0 + b_1AGE_0 + b_2BMI_0 + b_3SEX + t \beta_1 + \beta_2AGE_0 + \beta_3BMI_0 + \beta_4SEX + t^2 \gamma_1 + \gamma_2AGE_0 + \gamma_3BMI_0 + \gamma_4SEX + e_{i,t} \quad [1]$$

For each subject, time 0 (baseline) was defined as the first period in which BMI was greater or equal to 35 in our data. To address the irregular frequency of BMI measurements across patients, intensity of provider visit weights were estimated and applied to the GEE estimation of (1). For more details, see Wong, et al. (2012) [7]. The estimated model was used to predict BMI at a given age conditional on survival. Because the length of follow-up in the GH sample was six years, we adjusted baseline characteristics at six-year intervals when we generated predicted trajectories.

### *Survival*

Survival probabilities were obtained from static life tables stratified by BMI and Sex. We constructed these life tables by estimating the 5-year probability of death from a logistic regression model. We estimated 5-year death as a function of Sex, BMI, squared BMI, Age, squared Age as well as interactions for Sex/Age, Sex/BMI and BMI/Age. Data were from the NCHS National Health Interview Survey between the 1997 and 2000. Respondent were linked to the National Death Index allowing for mortality follow-up through December 31, 2005. Analogous to Schauer, et al. (2010) [8], our modeling focused on respondents with a BMI of 25 and above, excluding respondents below this threshold. The logistic model used 5-year death as the dependent outcome because of the limited very low incidence of death annually. Predicted 5-year death probabilities were used to calculate equivalent one-year probabilities through appropriate translations between instantaneous rates and probabilities. Consistent with previous literature, our results showed that death probabilities were higher among males and increase with age and BMI. Also, the increase in mortality risk due to obesity decreased with age. These predicted death probabilities were used to generate life expectancy given sex, age, and BMI using standard life table methods.

### *Direct Medical Cost and Utility*

Direct medical costs and health utilities were estimated using data from MEPS between 2000 and 2006. Given the predicted BMI and survival probability in each period, we estimated costs using a two-part model [9,10] to address the high proportion of MEPS respondents with zero costs. The first part of the two-part model estimated the probability of non-zero costs using a Probit model. We then estimated the second part of the two-part model using a GLM across the sample of respondents with non-zero costs. The GLM model was estimated assuming a square root link and gamma distribution, while adjusting for BMI, squared BMI, age and gender. A Box-Cox test and Modified Park test were used to verify the validity of the selected link and distribution. Predicted costs, conditional on BMI, age and gender, were calculated by weighting the expected value from the GLM model by the predicted probability of non-zero costs derived from the Probit model. Health utilities used in the natural history model were derived using methods described in the Decision Tree section. We applied MEPS sampling weights to cost and utility regressions in order to adjust the sample to reflect the U.S. population according to the Current Population Survey.

Expected costs from the two-part model were calculated by weighting expected costs conditional on non-zero costs by the likelihood of non-zero costs:

$$E(COST | X) = \text{Prob}(COST > 0) * E(COST | COST > 0, X). \quad [2]$$

where  $X$  includes BMI, age and gender. The marginal effect of BMI on costs is obtained by taking the derivative of (2):

$$\frac{\partial E(COST | X)}{\partial BMI} = \text{Pr}(COST > 0) * \frac{\partial E(COST | COST > 0, X)}{\partial BMI} + E(COST | COST > 0, X) * \frac{\partial \text{Pr}(COST > 0)}{\partial BMI}. \quad [3]$$

Marginal effects for age and gender were computed analogously.

**Table 1. Simulation Parameters for LAGB**

|                                                           | Value     | Source                |
|-----------------------------------------------------------|-----------|-----------------------|
| <i>General Characteristics</i>                            |           |                       |
| Number of Procedures                                      | 9,886     | CMS/Medicare          |
| Probability of post procedure hospitalization (<31 days)  | 5.30%     | CMS/Medicare          |
| Probability of Early Death (0-30 days)                    | 0.10%     | CMS/Medicare          |
| Cost of Early Death (0-30 days)                           | \$ 26,418 | Regression (Table 5)  |
| Mortality (31d-365d)                                      | 0.21%     | CMS/Medicare          |
| Mortality (Year 2)                                        | 0.52%     | Regression (Table 4)  |
| Mortality (Year 3)                                        | 0.58%     | Regression (Table 4)  |
| Mortality (Year 4)                                        | 0.63%     | Regression (Table 4)  |
| Mortality (Year 5)                                        | 0.68%     | Regression (Table 4)  |
| <i>Post Procedure Hospitalization</i>                     |           |                       |
| Total Cost (<31 days)                                     | \$ 31,095 | Regression (Table 5)  |
| Total Cost (31-365 days)                                  | \$ 20,429 | Regression (Table 6)  |
| Total Cost (Year 2)                                       | \$ 13,238 | Regression (Table 7)  |
| Total Cost (Year 3)                                       | \$ 13,232 | Regression (Table 8)  |
| Total Cost (Year 4)                                       | \$ 10,061 | Regression (Table 9)  |
| Total Cost (Year 5)                                       | \$ 3,526  | Regression (Table 10) |
| Cost of Death (All Periods)                               | \$ 38,049 | CMS/Medicare          |
| Utility (0-31 days)                                       | 0.70      | Picot, et al. (2009)  |
| Utility (31-365 days)                                     | 0.75      | Regression (Table 11) |
| Utility (Year 2)                                          | 0.73      | Regression (Table 11) |
| Utility (Year 3)                                          | 0.70      | Regression (Table 11) |
| Utility (Year 4)                                          | 0.67      | Regression (Table 11) |
| Utility (Year 5)                                          | 0.65      | Regression (Table 11) |
| <i>Subtotal: Expected Cost of With Hospitalization</i>    | \$ 93,352 |                       |
| <i>Subtotal: Expected Utility of With Hospitalization</i> | 4.15      |                       |
| <i>No Post Procedure Hospitalization</i>                  |           |                       |
| Total Cost (<31 days)                                     | \$ 14,159 | Regression (Table 5)  |
| Total Cost (31-365 days)                                  | \$ 7,835  | Regression (Table 6)  |
| Total Cost (Year 2)                                       | \$ 8,551  | Regression (Table 7)  |
| Total Cost (Year 3)                                       | \$ 7,917  | Regression (Table 8)  |
| Total Cost (Year 4)                                       | \$ 6,291  | Regression (Table 9)  |
| Total Cost (Year 5)                                       | \$ 2,685  | Regression (Table 10) |



|                                                              |           |                       |
|--------------------------------------------------------------|-----------|-----------------------|
| Cost of Death (All Periods)                                  | \$ 38,049 | CMS/Medicare          |
| Utility (0-31 days)                                          | 0.75      | Picot, et al. (2009)  |
| Utility (31-365 days)                                        | 0.75      | Regression (Table 11) |
| Utility (Year 2)                                             | 0.73      | Regression (Table 11) |
| Utility (Year 3)                                             | 0.70      | Regression (Table 11) |
| Utility (Year 4)                                             | 0.67      | Regression (Table 11) |
| Utility (Year 5)                                             | 0.65      | Regression (Table 11) |
| <i>Subtotal: Expected Cost of Without Hospitalization</i>    | \$ 49,434 |                       |
| <i>Subtotal: Expected Utility of Without Hospitalization</i> | 4.20      |                       |
| <i>Total Expected Open Band Cost</i>                         | \$ 51,736 |                       |
| <i>Total Expected Open Band Utility</i>                      | 4.19      |                       |

**Table 2. Simulation Parameters for LRYGB**

|                                                           | Value      | Source                |
|-----------------------------------------------------------|------------|-----------------------|
| <i>General Characteristics</i>                            |            |                       |
| Number of Procedures                                      | 18,341     | CMS/Medicare          |
| Probability of post procedure hospitalization (<31 days)  | 9.90%      | CMS/Medicare          |
| Probability of Early Death (0-30 days)                    | 0.28%      | CMS/Medicare          |
| Cost of Early Death (0-30days)                            | \$ 31,142  | Regression (Table 5)  |
| Mortality (31d-365d)                                      | 0.49%      | CMS/Medicare          |
| Mortality (Year 2)                                        | 0.42%      | Regression (Table 4)  |
| Mortality (Year 3)                                        | 0.46%      | Regression (Table 4)  |
| Mortality (Year 4)                                        | 0.51%      | Regression (Table 4)  |
| Mortality (Year 5)                                        | 0.57%      | Regression (Table 4)  |
| <i>Post Procedure Hospitalization</i>                     |            |                       |
| Total Cost (<31 days)                                     | \$ 36,655  | Regression (Table 5)  |
| Total Cost (31-365 days)                                  | \$ 24,753  | Regression (Table 6)  |
| Total Cost (Year 2)                                       | \$ 14,673  | Regression (Table 7)  |
| Total Cost (Year 3)                                       | \$ 14,218  | Regression (Table 8)  |
| Total Cost (Year 4)                                       | \$ 8,992   | Regression (Table 9)  |
| Total Cost (Year 5)                                       | \$ 1,558   | Regression (Table 10) |
| Cost of Death (All Periods)                               | \$ 38,049  | CMS/Medicare          |
| Utility (0-31 days)                                       | 0.70       | Picot, et al. (2009)  |
| Utility (31-365 days)                                     | 0.78       | Regression (Table 11) |
| Utility (Year 2)                                          | 0.74       | Regression (Table 11) |
| Utility (Year 3)                                          | 0.73       | Regression (Table 11) |
| Utility (Year 4)                                          | 0.70       | Regression (Table 11) |
| Utility (Year 5)                                          | 0.67       | Regression (Table 11) |
| <i>Subtotal: Expected Cost of With Hospitalization</i>    | \$ 102,682 |                       |
| <i>Subtotal: Expected Utility of With Hospitalization</i> | 4.27       |                       |
| <i>No Post Procedure Hospitalization</i>                  |            |                       |
| Total Cost (<31 days)                                     | \$ 16,691  | Regression (Table 5)  |
| Total Cost (31-365 days)                                  | \$ 9,494   | Regression (Table 6)  |
| Total Cost (Year 2)                                       | \$ 9,478   | Regression (Table 7)  |
| Total Cost (Year 3)                                       | \$ 8,507   | Regression (Table 8)  |
| Total Cost (Year 4)                                       | \$ 5,622   | Regression (Table 9)  |

|                                                              |           |                       |
|--------------------------------------------------------------|-----------|-----------------------|
| Total Cost (Year 5)                                          | \$ 1,221  | Regression (Table 10) |
| Cost of Death (All Periods)                                  | \$ 38,049 | CMS/Medicare          |
| Utility (0-31 days)                                          | 0.75      | Picot et al. (2009)   |
| Utility (31-365 days)                                        | 0.78      | Regression (Table 11) |
| Utility (Year 2)                                             | 0.74      | Regression (Table 11) |
| Utility (Year 3)                                             | 0.73      | Regression (Table 11) |
| Utility (Year 4)                                             | 0.70      | Regression (Table 11) |
| Utility (Year 5)                                             | 0.67      | Regression (Table 11) |
| <i>Subtotal: Expected Cost of Without Hospitalization</i>    | \$ 53,119 |                       |
| <i>Subtotal: Expected Utility of Without Hospitalization</i> | 4.32      |                       |
|                                                              |           |                       |
| <i>Total Expected Lap Bypass Cost</i>                        | \$ 57,950 |                       |
| <i>Total Expected Lap Bypass Utility</i>                     | 4.30      |                       |

**Table 3. Simulation Parameters for ORYGB**

|                                                           | Value     | Source                |
|-----------------------------------------------------------|-----------|-----------------------|
| <i>General Characteristics</i>                            |           |                       |
| Number of Procedures                                      | 14,358    | CMS/Medicare          |
| Probability of post procedure hospitalization (<31 days)  | 15.70%    | CMS/Medicare          |
| Probability of Early Death (0-30 days)                    | 1.08%     | CMS/Medicare          |
| Cost of Early Death (0-30days)                            | \$ 38,577 | Regression (Table 5)  |
| Mortality (31d-365d)                                      | 1.28%     | CMS/Medicare          |
| Mortality (Year 2)                                        | 0.42%     | Regression (Table 4)  |
| Mortality (Year 3)                                        | 0.46%     | Regression (Table 4)  |
| Mortality (Year 4)                                        | 0.51%     | Regression (Table 4)  |
| Mortality (Year 5)                                        | 0.57%     | Regression (Table 4)  |
| <i>Post Procedure Hospitalization</i>                     |           |                       |
| Total Cost (<31 days)                                     | \$ 45,406 | Regression (Table 5)  |
| Total Cost (31-365 days)                                  | \$ 33,500 | Regression (Table 6)  |
| Total Cost (Year 2)                                       | \$ 19,045 | Regression (Table 7)  |
| Total Cost (Year 3)                                       | \$ 18,781 | Regression (Table 8)  |
| Total Cost (Year 4)                                       | \$ 15,814 | Regression (Table 9)  |
| Total Cost (Year 5)                                       | \$ 7,571  | Regression (Table 10) |
| Cost of Death (All Periods)                               | \$ 38,049 | CMS/Medicare          |
| Utility (0-31 days)                                       | 0.70      | Picot, et al. (2009)  |
| Utility (31-365 days)                                     | 0.78      | Regression (Table 11) |
| Utility (Year 2)                                          | 0.74      | Regression (Table 11) |
| Utility (Year 3)                                          | 0.73      | Regression (Table 11) |
| Utility (Year 4)                                          | 0.70      | Regression (Table 11) |
| Utility (Year 5)                                          | 0.67      | Regression (Table 11) |
| <i>Subtotal: Expected Cost of With Hospitalization</i>    | \$142,192 |                       |
| <i>Subtotal: Expected Utility of With Hospitalization</i> | 4.24      |                       |
| <i>No Post Procedure Hospitalization</i>                  |           |                       |
| Total Cost (<31 days)                                     | \$ 20,675 | Regression (Table 5)  |
| Total Cost (31-365 days)                                  | \$ 12,849 | Regression (Table 6)  |
| Total Cost (Year 2)                                       | \$ 12,302 | Regression (Table 7)  |
| Total Cost (Year 3)                                       | \$ 11,237 | Regression (Table 8)  |

|                                                              |           |                       |
|--------------------------------------------------------------|-----------|-----------------------|
| Total Cost (Year 4)                                          | \$ 9,887  | Regression (Table 9)  |
| Total Cost (Year 5)                                          | \$ 5,764  | Regression (Table 10) |
| Cost of Death (All Periods)                                  | \$ 38,049 | CMS/Medicare          |
| Utility (0-31 days)                                          | 0.75      | Picot, et al. (2009)  |
| Utility (31-365 days)                                        | 0.78      | Regression (Table 11) |
| Utility (Year 2)                                             | 0.74      | Regression (Table 11) |
| Utility (Year 3)                                             | 0.73      | Regression (Table 11) |
| Utility (Year 4)                                             | 0.70      | Regression (Table 11) |
| Utility (Year 5)                                             | 0.67      | Regression (Table 11) |
| <i>Subtotal: Expected Cost of Without Hospitalization</i>    | \$ 75,547 |                       |
| <i>Subtotal: Expected Utility of Without Hospitalization</i> | 4.29      |                       |
|                                                              |           |                       |
| <i>Total Expected Open Bypass Cost</i>                       | \$ 85,498 |                       |
| <i>Total Expected Open Bypass Utility</i>                    | 4.24      |                       |

**Table 4: Regression results from mortality model.**

|              | <b>Coefficient</b> | <b>Std. Err</b> | <b>P-Value</b> |
|--------------|--------------------|-----------------|----------------|
| BMI          | 0.065              | 0.030           | 0.030          |
| Squared BMI  | 1.0E-04            | 2.8E-04         | 0.715          |
| Age          | 0.036              | 0.014           | 0.009          |
| Squared Age  | 5.0E-04            | 7.93E-05        | < 0.001        |
| Male (1=yes) | -0.192             | 0.324           | 0.553          |
| Male*BMI     | 0.006              | 0.008           | 0.451          |
| Male*Age     | 0.007              | 0.003           | 0.011          |
| BMI*Age      | -2.6E-04           | 2.5E-04         | 0.294          |
| Constant     | -8.361             | 0.807           | < 0.001        |
| N            | 89,606             |                 |                |

Logistic regression results estimating the probability of 5-year death among individuals from the National Health Interview Survey in years 1997 to 2000.

**Table 5: GLM regression results for direct medical costs in the 0-30 day period post-procedure.**

|                                     | <b>Coefficient</b> | <b>Std. Err</b> | <b>P-Value</b> |
|-------------------------------------|--------------------|-----------------|----------------|
| Age                                 | 0.0002             | 0.0002          | 0.1808         |
| Male (1=yes)                        | -0.0499            | 0.0048          | < 0.0001       |
| LAGB (1=yes)                        | -0.3786            | 0.0058          | < 0.0001       |
| LRYGB (1=yes)                       | -0.2141            | 0.0048          | < 0.0001       |
| ORYGB                               | Reference Category |                 |                |
| Alive w/Rehospitalization (1=yes)   | 0.1630             | 0.0250          | < 0.0001       |
| Alive w/o Rehospitalization (1=yes) | -0.6237            | 0.0242          | < 0.0001       |
| Constant                            | 10.5997            | 0.0266          | < 0.0001       |
| N                                   | 46,988             |                 |                |

Costs modeled using bariatric patients from Medicare claims during the period 2004 to 2008.

Total medical costs modeled using GLM with a gamma distribution and log link.

**Table 6: GLM regression results for direct medical costs in the 31-365 day period post-procedure.**

|                                     | <b>Coefficient</b> | <b>Std. Err</b> | <b>P-Value</b> |
|-------------------------------------|--------------------|-----------------|----------------|
| Age                                 | -0.0039            | 0.0005          | < 0.0001       |
| Male (1=yes)                        | -0.0223            | 0.0144          | 0.1214         |
| LAGB (1=yes)                        | -0.4946            | 0.0171          | < 0.0001       |
| LRYGB (1=yes)                       | -0.3026            | 0.0140          | < 0.0001       |
| ORYGB                               | Reference Category |                 |                |
| Alive w/o Rehospitalization (1=yes) | -0.9583            | 0.0210          | < 0.0001       |
| Constant                            | 10.6483            | 0.0395          | < 0.0001       |
| N                                   | 44,170             |                 |                |

Costs modeled using bariatric patients from Medicare claims during the period 2004 to 2008.  
Total medical costs modeled using GLM with a gamma distribution and log link.



**Table 7: GLM regression results for direct medical costs in year 2 post-procedure.**

|                                     | <b>Coefficient</b> | <b>Std. Err</b> | <b>P-Value</b> |
|-------------------------------------|--------------------|-----------------|----------------|
| Age                                 | -0.0027            | 0.0007          | < 0.0001       |
| Male (1=yes)                        | 0.0192             | 0.0180          | 0.2877         |
| LAGB (1=yes)                        | -0.3637            | 0.0224          | < 0.0001       |
| LRYGB (1=yes)                       | -0.2608            | 0.0166          | < 0.0001       |
| ORYGB                               | Reference Category |                 |                |
| Alive w/o Rehospitalization (1=yes) | -0.4370            | 0.0275          | < 0.0001       |
| Constant                            | 10.008             | 0.0488          | < 0.0001       |
| N                                   | 30,125             |                 |                |

Costs modeled using bariatric patients from Medicare claims during the period 2004 to 2008.  
Total medical costs modeled using GLM with a gamma distribution and log link.

**Table 8: GLM regression results for direct medical costs in year 3 post-procedure.**

|                                     | <b>Coefficient</b> | <b>Std. Err</b> | <b>P-Value</b> |
|-------------------------------------|--------------------|-----------------|----------------|
| Age                                 | -0.0020            | 0.0009          | 0.0179         |
| Male (1=yes)                        | -0.0045            | 0.0226          | 0.8422         |
| LAGB (1=yes)                        | -0.3502            | 0.0327          | < 0.0001       |
| LRYGB (1=yes)                       | -0.2783            | 0.0202          | < 0.0001       |
| ORYGB                               | Reference Category |                 |                |
| Alive w/o Rehospitalization (1=yes) | -0.5136            | 0.0356          | < 0.0001       |
| Constant                            | 10.0102            | 0.0623          | < 0.0001       |
| N                                   | 19,957             |                 |                |

Costs modeled using bariatric patients from Medicare claims during the period 2004 to 2008.  
Total medical costs modeled using GLM with a gamma distribution and log link.

**Table 9: GLM regression results for direct medical costs in year 4 post-procedure.**

|                                     | <b>Coefficient</b> | <b>Std. Err</b> | <b>P-Value</b> |
|-------------------------------------|--------------------|-----------------|----------------|
| Age                                 | -0.0004            | 0.0011          | 0.0758         |
| Male (1=yes)                        | -0.0527            | 0.0297          | 0.7037         |
| LAGB (1=yes)                        | -0.4522            | 0.0540          | < 0.0001       |
| LRYGB (1=yes)                       | -0.5645            | 0.0272          | < 0.0001       |
| ORYGB                               | Reference Category |                 |                |
| Alive w/o Rehospitalization (1=yes) | -0.4696            | 0.0484          | < 0.0001       |
| Constant                            | 9.8312             | 0.0815          | < 0.0001       |
| N                                   | 12,923             |                 |                |

Costs modeled using bariatric patients from Medicare claims during the period 2004 to 2008.  
Total medical costs modeled using GLM with a gamma distribution and log link.

**Table 10: GLM regression results for direct medical costs in year 5 post-procedure.**

|                                     | <b>Coefficient</b> | <b>Std. Err</b> | <b>P-Value</b> |
|-------------------------------------|--------------------|-----------------|----------------|
| Age                                 | 0.0006             | 0.0018          | 0.7302         |
| Male (1=yes)                        | -0.1838            | 0.0498          | 0.0002         |
| LAGB (1=yes)                        | -0.7641            | 0.2342          | < 0.0001       |
| LRYGB (1=yes)                       | -1.5811            | 0.0911          | < 0.0001       |
| ORYGB                               | Reference Category |                 |                |
| Alive w/o Rehospitalization (1=yes) | -0.2727            | 0.0981          | 0.0054         |
| Constant                            | 9.2023             | 0.1463          | < 0.0001       |
| N                                   | 5,147              |                 |                |

Costs modeled using bariatric patients from Medicare claims during the period 2004 to 2008.  
Total medical costs modeled using GLM with a gamma distribution and log link.

**Table 11: Regression results from GLM utility model.**

|                | <b>Coefficient</b> | <b>Std. Err</b> | <b>P-Value</b> |
|----------------|--------------------|-----------------|----------------|
| BMI            | 0.031              | 7.5E-04         | < 0.001        |
| Age            | 0.024              | 2.7E-04         | < 0.001        |
| Female (1=yes) | 0.245              | 0.010           | < 0.001        |
| Constant       | -4.263             | 0.027           | < 0.001        |
| N              | 122,609            |                 |                |

Health utility modeled using individuals from the Medical Expenditure Panel Survey from 2000 to 2006.  
GLM model assumes a gamma distribution and log link.

A reflective transformation was applied to EQ-5D scores in order to allow for GLM estimation.

**Table 12: Regression results from two-part model estimating total medical expenditure.**

|                | Probit (First Part) |          |         | GLM (Second Part) |          |         |
|----------------|---------------------|----------|---------|-------------------|----------|---------|
|                | Coefficient         | Std. Err | P-Value | Coefficient       | Std. Err | P-Value |
| BMI            | 0.009               | 0.004    | 0.020   | -1.797            | 0.540    | 0.001   |
| Squared BMI    | 6.73E-06            | 5.99E-05 | 0.911   | 0.037             | 0.008    | < 0.001 |
| Age            | 0.023               | 3.38E-04 | < 0.001 | 0.906             | 0.025    | < 0.001 |
| Female (1=yes) | 0.569               | 0.011    | < 0.001 | 6.979             | 0.952    | < 0.001 |
| Constant       | -0.392              | 0.063    | < 0.001 | 41.666            | 8.496    | < 0.001 |
| N              | 129,644             |          |         | 106,790           |          |         |

Medical expenditure modeled using individuals from the Medical Expenditure Panel Survey from 2000 to 2006.

The probability of non-zero costs model in the first part.

Total medical costs in the second part modeled using GLM with a gamma distribution and square root link.
